# Supplementary material
Source: Research Square preprint supplement (doi:10.21203/rs.3.rs-10386989/v1)
Supplement: Supplementary file 1 [file 615804288190b97804db53d6.docx]

Table 2 summarizes these mutational mechanisms and their functional consequences as characterized in the literature.

| Mutational Event * | *Functional Impact | Source** |
| --- | --- | --- |
| Single nucleotide polymorphisms (SNPs) | Fine-tunes effector recognition; enables evasion of host immunity | Plissonneau et al., 2018; Chaloner et al., 2021 |
| Effector gene diversification | Broadens host range; enhances virulence via accessory-genome remodeling | Dong et al., 2015; Ngou et al., 2022 |
| Copy number variation (CNVs) | Increases effector dosage and diversity; supports rapid adaptation | Seidl & Thomma, 2017 |
| Transposable element activity | Modulates gene expression; generates novel pathogenic traits | Faino et al., 2016; Seidl & Thomma, 2017 |
| Horizontal gene transfer | Acquisition of novel virulence factors; genome plasticity in fungi and bacteria | Choi & Kim, 2022 |
