# Supplementary material
Source: Research Square preprint supplement (doi:10.21203/rs.3.rs-10386989/v1)
Supplement: Supplementary file 2 [file 86e54eb89f8a60a627918056.docx]

Table 1 illustrates how this pattern has been characterized across different crop-pathogen systems in representative recent studies.

| Crop | Resistance Architecture | Key Findings | Source |
| --- | --- | --- | --- |
| Rice | Combined PTI-ETI signaling and stacked R genes | Integrated surface/ intracellular immune receptor perception enhances durability against blast and blight | Kourelis & van der Hoorn, 2018; Zaidi et al., 2021; Ngou et al., 2022 |
| Wheat | R gene clusters and core-genome SNP variation | Core-genome variation shapes pathogen recognition and resistance durability | Plissonneau et al., 2018 |
| Maize/ Solanaceous crops | Copy number variation and transposon-associated resistance loci | CNVs and transposable elements contribute to broad-spectrum, adaptable resistance | Seidl & Thomma, 2017; Dong et al., 2015 |
| Multiple hosts | Effector-triggered immunity potentiated by cell-surface receptors | Mutual potentiation of surface and intracellular immune layers strengthens overall resistance | Ngou et al., 2022 |
